# Supplementary material for: Tumor suppression through the interaction between CNTN4 and PTPRG attenuates EGFR signaling in colorectal cancer
Source: Research Square preprint supplement (doi:10.21203/rs.3.rs-6866028/v1), 2025-06-30
Supplement: Supplementary file 1 [file 0f6a28a416305a48f4b3fe7b.pdf]

**Supplementary Table 2. Association of LOH at microsatellite markers with clinicopathological characteristics in 179 patients with CRC.**

| Variable                              | D3S2397 <sup>a</sup> |                    | <i>P</i>     |
|---------------------------------------|----------------------|--------------------|--------------|
|                                       | Deleted<br>(n=35)    | Retained<br>(n=91) |              |
| <b>Age at diagnosis (years)</b>       |                      |                    | <b>0.046</b> |
| Median                                | 66                   | 76                 |              |
| Range                                 | 46-95                | 41-98              |              |
| <b>Gender</b>                         |                      |                    | 0.320        |
| Male                                  | 20                   | 43                 |              |
| Female                                | 15                   | 48                 |              |
| <b>Tumor location<sup>b</sup></b>     |                      |                    | 0.467        |
| Proximal colon                        | 6                    | 21                 |              |
| Distal colon                          | 29                   | 70                 |              |
| <b>Pathological grade</b>             |                      |                    | 0.064        |
| Well                                  | 1                    | 8                  |              |
| Moderate                              | 19                   | 64                 |              |
| Poor                                  | 14                   | 19                 |              |
| <b>pT status</b>                      |                      |                    | 0.069        |
| T1-2                                  | 2                    | 17                 |              |
| T3-4                                  | 33                   | 74                 |              |
| <b>pN status</b>                      |                      |                    | 0.530        |
| N0                                    | 19                   | 55                 |              |
| N1-2                                  | 16                   | 36                 |              |
| <b>pM status</b>                      |                      |                    | <b>0.007</b> |
| M0                                    | 23                   | 79                 |              |
| M1                                    | 12                   | 12                 |              |
| <b>Tumor stage</b>                    |                      |                    | 0.224        |
| I/II                                  | 15                   | 50                 |              |
| III/IV                                | 20                   | 41                 |              |
| <b>Disease recurrence<sup>c</sup></b> |                      |                    | 0.239        |
| No                                    | 18                   | 44                 |              |
| Yes                                   | 4                    | 20                 |              |

<sup>a</sup>LOH assessment only in the cases that were informative at markers.

<sup>b</sup>Proximal colon: cecum, ascending, hepatic flexure, and transverse colon;  
Distal colon: splenic flexure, descending, sigmoid colon, and rectum.

<sup>c</sup>Recurrence for stage II/III disease.
